# Supplementary material
Source: HighWire-hosted journal article supplement (https://bmjopen.bmj.com/content/13/12/e077180)
Supplement: inline-supplementary-material-1 [file inline-supplementary-material-1.pdf]

**PRISMA-P (Preferred Reporting Items for Systematic review and Meta-Analysis Protocols) 2015 checklist: recommended items to address in a systematic review protocol\***

| Section and topic                 | Item No | Checklist item                                                                                                                                                                                  | Reported on Page |
|-----------------------------------|---------|-------------------------------------------------------------------------------------------------------------------------------------------------------------------------------------------------|------------------|
| <b>ADMINISTRATIVE INFORMATION</b> |         |                                                                                                                                                                                                 |                  |
| Title:                            |         |                                                                                                                                                                                                 |                  |
| Identification                    | 1a      | Identify the report as a protocol of a systematic review                                                                                                                                        | Page 0           |
| Update                            | 1b      | If the protocol is for an update of a previous systematic review, identify as such                                                                                                              | N/A              |
| Registration                      | 2       | If registered, provide the name of the registry (such as PROSPERO) and registration number                                                                                                      | Page 1           |
| Authors:                          |         |                                                                                                                                                                                                 |                  |
| Contact                           | 3a      | Provide name, institutional affiliation, e-mail address of all protocol authors; provide physical mailing address of corresponding author                                                       | Page 0           |
| Contributions                     | 3b      | Describe contributions of protocol authors and identify the                                                                                                                                     | Page 19          |
| Amendments                        | 4       | If the protocol represents an amendment of a previously completed or published protocol, identify as such and list changes; otherwise, state plan for documenting important protocol amendments | N/A              |
| Support:                          |         |                                                                                                                                                                                                 |                  |
| Sources                           | 5a      | Indicate sources of financial or other support for the review                                                                                                                                   | Page 19          |
| Sponsor                           | 5b      | Provide name for the review funder and/or sponsor                                                                                                                                               | Page 19          |
| Role of sponsor or funder         | 5c      | Describe roles of funder(s), sponsor(s), and/or institution(s), if any, in developing the protocol                                                                                              | N/A              |
| <b>INTRODUCTION</b>               |         |                                                                                                                                                                                                 |                  |
| Rationale                         | 6       | Describe the rationale for the review in the context of what is already known                                                                                                                   | Page 3-5         |
| Objectives                        | 7       | Provide an explicit statement of the question(s) the review will address with reference to participants, interventions, comparators, and outcomes (PICO)                                        | Page 5-6         |

**METHODS**

|                                    |     |                                                                                                                                                                                                                                                  |                 |
|------------------------------------|-----|--------------------------------------------------------------------------------------------------------------------------------------------------------------------------------------------------------------------------------------------------|-----------------|
| Eligibility criteria               | 8   | Specify the study characteristics (such as PICO, study design, setting, time frame) and report characteristics (such as years considered, language, publication status) to be used as criteria for eligibility for the review                    | Page 6-8        |
| Information sources                | 9   | Describe all intended information sources (such as electronic databases, contact with study authors, trial registers or other grey literature sources) with planned dates of coverage                                                            | Page 8-9        |
| Search strategy                    | 10  | Present draft of search strategy to be used for at least one electronic database, including planned limits, such that it could be repeated                                                                                                       | Appendix 2      |
| Study records:                     |     |                                                                                                                                                                                                                                                  |                 |
| Data management                    | 11a | Describe the mechanism(s) that will be used to manage records and data throughout the review                                                                                                                                                     | Page 9          |
| Selection process                  | 11b | State the process that will be used for selecting studies (such as two independent reviewers) through each phase of the review (that is, screening, eligibility and inclusion in meta-analysis)                                                  | Page 9-11       |
| Data collection process            | 11c | Describe planned method of extracting data from reports (such as piloting forms, done independently, in duplicate), any processes for obtaining and confirming data from investigators                                                           | Page 9-11       |
| Data items                         | 12  | List and define all variables for which data will be sought (such as PICO items, funding sources), any pre-planned data assumptions and simplifications                                                                                          | Page 9-11       |
| Outcomes and prioritization        | 13  | List and define all outcomes for which data will be sought, including prioritization of main and additional outcomes, with rationale                                                                                                             | Page 7-8, 12-13 |
| Risk of bias in individual studies | 14  | Describe anticipated methods for assessing risk of bias of individual studies, including whether this will be done at the outcome or study level, or both; state how this information will be used in data synthesis                             | Page 11-12      |
| Data synthesis                     | 15a | Describe criteria under which study data will be quantitatively synthesised                                                                                                                                                                      | Page 12-15      |
|                                    | 15b | If data are appropriate for quantitative synthesis, describe planned summary measures, methods of handling data and methods of combining data from studies, including any planned exploration of consistency (such as $I^2$ , Kendall's $\tau$ ) | Page 12-16      |

|                                   |     |                                                                                                                               |            |
|-----------------------------------|-----|-------------------------------------------------------------------------------------------------------------------------------|------------|
|                                   | 15c | Describe any proposed additional analyses (such as sensitivity or subgroup analyses, meta-regression)                         | Page 14    |
|                                   | 15d | If quantitative synthesis is not appropriate, describe the type of summary planned                                            | Page 12-13 |
| Meta-bias(es)                     | 16  | Specify any planned assessment of meta-bias(es) (such as publication bias across studies, selective reporting within studies) | Page 14    |
| Confidence in cumulative evidence | 17  | Describe how the strength of the body of evidence will be assessed (such as GRADE)                                            | Page 12    |

**\* It is strongly recommended that this checklist be read in conjunction with the PRISMA-P Explanation and Elaboration (cite when available) for important clarification on the items. Amendments to a review protocol should be tracked and dated. The copyright for PRISMA-P (including checklist) is held by the PRISMA-P Group and is distributed under a Creative Commons Attribution Licence 4.0.**

*From: Shamseer L, Moher D, Clarke M, Ghersi D, Liberati A, Petticrew M, Shekelle P, Stewart L, PRISMA-P Group. Preferred reporting items for systematic review and meta-analysis protocols (PRISMA-P) 2015: elaboration and explanation. BMJ. 2015 Jan 2;349(jan02 1):g7647.*

**Enhancing transparency in reporting the synthesis of qualitative research: ENTREQ Checklist (Tong, et al., 2012)**

| Item No.                      | Guide and Description                                                                                                                                                                                                                                                                                                                                                                          | Reported on Page |
|-------------------------------|------------------------------------------------------------------------------------------------------------------------------------------------------------------------------------------------------------------------------------------------------------------------------------------------------------------------------------------------------------------------------------------------|------------------|
| 1. Aim                        | State the research question the synthesis addresses                                                                                                                                                                                                                                                                                                                                            | 5-6              |
| 2. Synthesis methodology      | Identify the synthesis methodology or theoretical framework which underpins the synthesis, and describe the rationale for choice of methodology (e.g. meta-ethnography, thematic synthesis, critical interpretive synthesis, grounded theory synthesis, realist synthesis, meta-aggregation, meta-study, framework synthesis)                                                                  | 14-15            |
| 3. Approach to searching      | Indicate whether the search was pre-planned (comprehensive search strategies to seek all available studies) or iterative (to seek all available concepts until they theoretical saturation is achieved)                                                                                                                                                                                        | 8                |
| 4. Inclusion criteria         | Specify the inclusion/exclusion criteria (e.g. in terms of population, language, year limits, type of publication, study type)                                                                                                                                                                                                                                                                 | 6-8              |
| 5. Data sources               | Describe the information sources used (e.g. electronic databases (MEDLINE, EMBASE, CINAHL, psycINFO), grey literature databases (digital thesis, policy reports), relevant organisational websites, experts, information specialists, generic web searches (Google Scholar) hand searching, reference lists) and when the searches conducted; provide the rationale for using the data sources | 8-9              |
| 6. Electronic Search strategy | Describe the literature search (e.g. provide electronic search strategies with population terms, clinical or health topic terms, experiential or social phenomena related terms, filters for qualitative research, and search limits)                                                                                                                                                          | 8-9              |
| 7. Study screening methods    | Describe the process of study screening and sifting (e.g. title, abstract and full text review, number of independent reviewers who screened studies)                                                                                                                                                                                                                                          | 9                |
| 8. Study characteristics      | Present the characteristics of the included studies (e.g. year of publication, country, population, number of participants, data collection, methodology, analysis, research questions)                                                                                                                                                                                                        | N/A              |
| 9. Study selection results    | Identify the number of studies screened and provide reasons for study exclusion (e.g. for comprehensive searching, provide numbers of studies screened and reasons for exclusion indicated in a figure/flowchart; for iterative searching describe reasons for study exclusion and inclusion based on modifications to the research question and/or contribution to theory development)        | N/A              |

|                             |                                                                                                                                                                                                                                                                                             |       |
|-----------------------------|---------------------------------------------------------------------------------------------------------------------------------------------------------------------------------------------------------------------------------------------------------------------------------------------|-------|
| 10. Rationale for appraisal | Describe the rationale and approach used to appraise the included studies or selected findings (e.g. assessment of conduct (validity and robustness), assessment of reporting (transparency), assessment of content and utility of the findings)                                            | N/A   |
| 11. Appraisal items         | State the tools, frameworks and criteria used to appraise the studies or selected findings (e.g. Existing tools: CASP, QARI, COREQ, Mays and Pope [25]; reviewer developed tools; describe the domains assessed: research team, study design, data analysis and interpretations, reporting) | 12    |
| 12. Appraisal process       | Indicate whether the appraisal was conducted independently by more than one reviewer and if consensus was required                                                                                                                                                                          | 12    |
| 13. Appraisal results       | Present results of the quality assessment and indicate which articles, if any, were weighted/excluded based on the assessment and give the rationale                                                                                                                                        | N/A   |
| 14. Data extraction         | Indicate which sections of the primary studies were analysed and how were the data extracted from the primary studies? (e.g. all text under the headings “results /conclusions” were extracted electronically and entered into a computer software)                                         | 11    |
| 15. Software                | State the computer software used, if any                                                                                                                                                                                                                                                    | 11    |
| 16. Number of reviewers     | Identify who was involved in coding and analysis                                                                                                                                                                                                                                            | 14-15 |
| 17. Coding                  | Describe the process for coding of data (e.g. line by line coding to search for concepts)                                                                                                                                                                                                   | 14-15 |
| 18. Study comparison        | Describe how were comparisons made within and across studies (e.g. subsequent studies were coded into pre-existing concepts, and new concepts were created when deemed necessary)                                                                                                           | N/A   |
| 19. Derivation of themes    | Explain whether the process of deriving the themes or constructs was inductive or deductive                                                                                                                                                                                                 | 14-15 |
| 20. Quotations              | Provide quotations from the primary studies to illustrate themes/constructs, and identify whether the quotations were participant quotations of the author’s interpretation                                                                                                                 | N/A   |
| 21. Synthesis output        | Present rich, compelling and useful results that go beyond a summary of the primary studies (e.g. new interpretation, models of evidence, conceptual models, analytical framework, development of a new theory or construct)                                                                | N/A   |
