# Supplementary material
Source: HighWire-hosted journal article supplement (https://bmjopen.bmj.com/content/13/12/e077180)
Supplement: inline-supplementary-material-2 [file inline-supplementary-material-2.pdf]

**Database:** Ovid MEDLINE

| Search nr                       | Term                                                                                                                                                                                                                                                                                                                                                                                                                                                                                                                                                                                                                                                                          | Comment          |
|---------------------------------|-------------------------------------------------------------------------------------------------------------------------------------------------------------------------------------------------------------------------------------------------------------------------------------------------------------------------------------------------------------------------------------------------------------------------------------------------------------------------------------------------------------------------------------------------------------------------------------------------------------------------------------------------------------------------------|------------------|
| <i>Concept 1 – Population</i>   |                                                                                                                                                                                                                                                                                                                                                                                                                                                                                                                                                                                                                                                                               |                  |
| 1                               | exp Dementia/<br>OR exp Cognition Disorders/<br>OR Cognitive Dysfunction/                                                                                                                                                                                                                                                                                                                                                                                                                                                                                                                                                                                                     | [MeSH]           |
| 2                               | (dement* or Alzheimer* or lewy* or frontotemporal or FTD or FTLD or tvFTD or OBS or OBD or (lewy* adj2 bod*) or organic brain syndrome* or organic brain disease or organic brain disorder* or (ARD or AAMI or AACD or MCI or A-MCI or N-MCI or M-MCI or aMCI or MCIa or CIND or MCD or MNC or MNCD or NCD) or ag* associated cogniti* decline or ag* associated memory impairment or mild cognitive impairment or neurocognitive disorder* or preclinical AD or pre-clinical AD or (pre adj clinical AD)).ti,ab.                                                                                                                                                             | [Title/Abstract] |
| 3                               | 1 OR 2                                                                                                                                                                                                                                                                                                                                                                                                                                                                                                                                                                                                                                                                        |                  |
| <i>Concept 2 – Intervention</i> |                                                                                                                                                                                                                                                                                                                                                                                                                                                                                                                                                                                                                                                                               |                  |
| 4                               | exp Counseling/<br>OR exp Behavior Therapy/<br>OR exp Psychotherapy/<br>OR exp Bibliotherapy/                                                                                                                                                                                                                                                                                                                                                                                                                                                                                                                                                                                 | [MeSH]           |
| 5                               | ((non adj pharmacologic*) or non-pharmacologic* or nonpharmacologic* or cognitive restructuring or cognitive reframing or behavio* activation or activity scheduling or problem solving or (cCBT or iCBT or ehealth or e-health or teletherapy or telehealth) or (self adj help) or (self adj manag*) or (self adj administer*) or (psycho* adj therapy) or (cognitive adj2 therap*) or (behavio* adj2 therap*) or (CBT or psychotherapy or psychodynamic or counseling or counselling or psychoeducation* or psychosocial or psychosocial) or (group adj therap*) or (group adj treatment*) or (group adj intervention*) or (group adj support) or psycho education*).ti,ab. | [Title/Abstract] |
| 6                               | 4 OR 5                                                                                                                                                                                                                                                                                                                                                                                                                                                                                                                                                                                                                                                                        |                  |
| <i>Concept 3 – Outcome</i>      |                                                                                                                                                                                                                                                                                                                                                                                                                                                                                                                                                                                                                                                                               |                  |
| 7                               | exp Depression/<br>OR exp Anxiety/<br>OR exp Anxiety Disorders/<br>OR exp Mood Disorders/<br>OR Affective Symptoms/<br>OR Psychological Distress/                                                                                                                                                                                                                                                                                                                                                                                                                                                                                                                             | [MeSH]           |
| 8                               | ("quality of life" or (mental adj health) or (mental adj distress) or (mental adj illness) or (psycholo*                                                                                                                                                                                                                                                                                                                                                                                                                                                                                                                                                                      | [Title/Abstract] |

|                                 |                                                                                                                                                                                                                                                                         |                  |
|---------------------------------|-------------------------------------------------------------------------------------------------------------------------------------------------------------------------------------------------------------------------------------------------------------------------|------------------|
|                                 | adj distress) or (neuropsycholog* or neuropsychiatric) or (mood or emotion* or affective or wellbeing or well-being or distress) or (negative adj affect) or Depress* or Melanchol* or Dysphori* or (anxiety or anxious or stress or worr*) or (well adj being)).ti,ab. |                  |
| 9                               | 7 OR 8                                                                                                                                                                                                                                                                  |                  |
| <i>Concept 4 – Study design</i> |                                                                                                                                                                                                                                                                         |                  |
| 10                              | exp Randomized Controlled Trial/<br>OR exp Clinical Trial/<br>OR Meta-Analysis/<br>OR Random Allocation/                                                                                                                                                                | [MeSH]           |
| 11                              | (random* controlled trial* or (RCT or Trial or review or meta-analysis) or (random* adj allocat*)).ti,ab.                                                                                                                                                               | [Title/Abstract] |
| 12                              | 10 OR 11                                                                                                                                                                                                                                                                |                  |
| <i>Final results</i>            | 3 AND 6 AND 9 AND 12                                                                                                                                                                                                                                                    |                  |
